# Supplementary material
Source: PubMed Central journal article supplement (PMC9255922)
Supplement: gbab222_suppl_supplementary_appendix.pdf [file gbab222_suppl_supplementary_appendix.pdf]

**Online Supplementary Materials**

**Appendix Figure 1. Predicted probability of talking to friends every day by family structure and educational attainment**

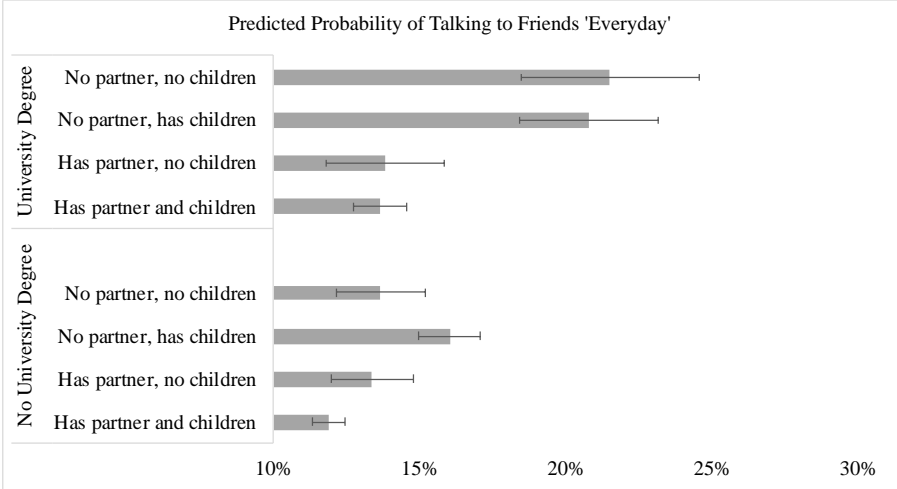

Notes: Predicted probabilities estimated from Table 3.

Appendix Table 1. Odds ratios from ordinal and binary logit models predicting additional social health outcomes, Ages 45+ (N=22,105)

|                                                                                                                                                    | <i>Seeing Relatives</i> | <i>Seeing Friends</i> | <i>Seeing friends or family at least a few times/week</i> | <i>Seeing friends or family every day</i> | <i>Emotional Loneliness</i> | <i>Social Loneliness</i> |
|----------------------------------------------------------------------------------------------------------------------------------------------------|-------------------------|-----------------------|-----------------------------------------------------------|-------------------------------------------|-----------------------------|--------------------------|
|                                                                                                                                                    | Model 1                 | Model 2               | Model 3                                                   | Model 4                                   | Model 5                     | Model 6                  |
| <b>Family Structure (Has partner and children)</b>                                                                                                 |                         |                       |                                                           |                                           |                             |                          |
| Has partner, no children                                                                                                                           | 0.778***                | 1.012                 | 0.887                                                     | 0.950                                     | 0.983                       | 0.805***                 |
| No partner, has children                                                                                                                           | 1.052                   | 1.292***              | 1.365***                                                  | 1.387***                                  | 0.588***                    | 0.686***                 |
| No partner, no children                                                                                                                            | 0.664***                | 1.273***              | 1.130*                                                    | 1.254**                                   | 0.621***                    | 0.574***                 |
| <b>Covariates</b>                                                                                                                                  |                         |                       |                                                           |                                           |                             |                          |
| Male (Female)                                                                                                                                      | 0.760***                | 0.924**               | 0.804***                                                  | 0.875**                                   | 0.948                       | 0.767***                 |
| <b>Age (45-49)</b>                                                                                                                                 |                         |                       |                                                           |                                           |                             |                          |
| 50-54                                                                                                                                              | 1.081                   | 0.946                 | 0.989                                                     | 1.078                                     | 1.101                       | 0.962                    |
| 55-59                                                                                                                                              | 1.105*                  | 0.902*                | 0.959                                                     | 1.001                                     | 0.971                       | 1.035                    |
| 60-64                                                                                                                                              | 1.165**                 | 1.040                 | 1.110                                                     | 0.998                                     | 1.080*                      | 1.289***                 |
| 65-69                                                                                                                                              | 1.169**                 | 1.001                 | 1.071                                                     | 0.938                                     | 1.182*                      | 1.417***                 |
| 70-74                                                                                                                                              | 1.087                   | 1.14                  | 1.178*                                                    | 1.034                                     | 1.238**                     | 1.595***                 |
| 75-79                                                                                                                                              | 1.113                   | 0.990                 | 1.058                                                     | 1.025                                     | 1.121                       | 1.623***                 |
| 80+                                                                                                                                                | 1.136                   | 0.736***              | 0.941                                                     | 1.043                                     | 1.272**                     | 1.892***                 |
| <b>Education (Less than high school)</b>                                                                                                           |                         |                       |                                                           |                                           |                             |                          |
| High school degree                                                                                                                                 | 1.039                   | 1.112*                | 1.012                                                     | 0.833**                                   | 1.375***                    | 1.023                    |
| Some university/college/trades                                                                                                                     | 0.914*                  | 1.043                 | 0.916                                                     | 0.762***                                  | 1.412***                    | 0.850***                 |
| University degree                                                                                                                                  | 0.785***                | 0.970                 | 0.788***                                                  | 0.563***                                  | 1.923***                    | 0.812***                 |
| Missing                                                                                                                                            | 1.112                   | 0.970                 | 0.847                                                     | 1.045                                     | 2.741***                    | 2.060***                 |
| <b>Native-Born (Foreign-born)</b>                                                                                                                  |                         |                       |                                                           |                                           |                             |                          |
| Worked in the Last Year as Main Activity (Work not main activity)                                                                                  | 0.939                   | 1.067                 | 0.923                                                     | 0.947                                     | 1.333***                    | 1.191***                 |
| <b>Province (Ontario)</b>                                                                                                                          |                         |                       |                                                           |                                           |                             |                          |
| Quebec                                                                                                                                             | 1.425***                | 0.874**               | 1.074                                                     | 0.948                                     | 0.760***                    | 1.259***                 |
| Manitoba                                                                                                                                           | 1.069                   | 1.162*                | 1.151                                                     | 1.291**                                   | 1.041                       | 1.153*                   |
| Saskatchewan                                                                                                                                       | 0.902                   | 1.322***              | 1.292**                                                   | 1.367**                                   | 0.801**                     | 1.125                    |
| Alberta                                                                                                                                            | 0.783***                | 1.003                 | 0.991                                                     | 0.924                                     | 1.017                       | 1.04                     |
| British Columbia                                                                                                                                   | 0.745***                | 1.173**               | 1.106                                                     | 1.167*                                    | 1.043                       | 1.045                    |
| Eastern Provinces                                                                                                                                  | 1.602***                | 1.755***              | 1.898***                                                  | 1.954***                                  | 0.782***                    | 1.145**                  |
| <i>Cut Point 1</i>                                                                                                                                 | -1.169                  | -1.705                |                                                           |                                           | -2.685                      | -2.191                   |
| <i>Cut Point 2</i>                                                                                                                                 | -0.278                  | -0.860                |                                                           |                                           | -1.206                      | -1.166                   |
| <i>Cut Point 3</i>                                                                                                                                 | 0.924                   | 0.553                 |                                                           |                                           | 0.475                       | -0.177                   |
| <i>Cut Point 4</i>                                                                                                                                 | 2.810                   | 2.563                 |                                                           |                                           |                             |                          |
| <i>Constant</i>                                                                                                                                    |                         |                       | 1.324***                                                  | 0.204***                                  |                             |                          |
| Notes: Models 1, 2, 5 and 6 are ordinal logit, models 3 and 4 are binomial logistic regression.                                                    |                         |                       |                                                           |                                           |                             |                          |
| Cut points are shown for all ordinal logistic regression models, which enable calculation of predicted probabilities for different outcome levels. |                         |                       |                                                           |                                           |                             |                          |
| *** p<0.001, ** p<0.01, * p<0.05                                                                                                                   |                         |                       |                                                           |                                           |                             |                          |
